# Supplementary material for: Accurate and reliable quantification of total microalgal fuel potential as fatty acid methyl esters by in situ transesterification
Source: PubMed Central journal article supplement (PMC3309134; doi:10.1007/s00216-012-5814-0), 2012-02-18
Supplement: 216_2012_5814_MOESM1_ESM.pdf [file 216_2012_5814_MOESM1_ESM.pdf]

**Analytical and Bioanalytical Chemistry**

**Electronic Supplementary Material**

**Accurate and reliable quantification of total microalgal fuel potential as fatty acid methyl esters by in situ transesterification**

Lieve M.L. Laurens, Matthew Quinn, Stefanie Van Wychen, David W. Templeton,

Edward J. Wolfrum

## Text S1: Analysis script

```
# Scripts used for statistical analysis of the results presented in
# "Accurate and reliable quantification of total microalgal fuel potential as fatty acid methyl
esters by in situ transesterification"
# R version 2.13.1 (2011-07-08) http://www.R-project.org
# by Lieve Laurens - November 2011
# National Renewable Energy Laboratory

setwd("~/Documents/In situ transesterification")

library(gplots)

# Figure 1: Quantitative extracted lipid yields of Nannochloropsis sp. biomass

ext <- read.csv(file = "Extractions.csv", header = T, stringsAsFactors = FALSE)
ext.mean <- aggregate(ext[,c("extract")],list(ext$methods),mean)
ext.sd <- aggregate(ext[,c("extract")],list(ext$methods),sd)
ci.l <- ext.mean[,2] + ext.sd[,2]
ci.u <- ext.mean[,2] - ext.sd[,2]
barplot2(ext.mean[,2], names.arg = ext.mean[,1], plot.grid = T , plot.ci = TRUE, ci.l = ci.l,
ci.u = ci.u, ylab = "Extract (% DW)")

#statistics
j <- aov(ext[,c("extract")] ~ factor(ext$methods)); TukeyHSD(j)

# Figure 2: FAME content using 9 different conditions (catalysts, varying reaction conditions,
...)

cat <- read.csv(file = "Catalyst.csv", header = TRUE, stringsAsFactors = FALSE)
cat.mean <- aggregate(cat[,c("FAME")],list(cat$X),mean)
cat.sd <- aggregate(cat[,c("FAME")],list(cat$X),sd)
ci.l <- cat.mean[,2] + cat.sd[,2]
ci.u <- cat.mean[,2] - cat.sd[,2]

par(las = 3, mar = c(7,4,4,2)+0.1)
barplot2(cat.mean[,2], names.arg = cat.mean[,1], plot.grid = T , plot.ci = TRUE, ci.l = ci.l,
ci.u = ci.u, ylab = "FAME (% DW)")
text(locator(1),"ND")

# statistics
j <- aov(cat[,c("FAME")] ~ factor(cat$X)); TukeyHSD(j)

# Figure 3: FAME yield as a function of time and temperature for 4 species
timeTemp <- read.csv(file = "TimeTemp.csv", header = TRUE, stringsAsFactors = FALSE)

library(scatterplot3d)
```

```

plotExpDesign <- function(alga) {

  x <- timeTemp[which(timeTemp$Strain == alga),"time"]
  y <- timeTemp[which(timeTemp$Strain == alga),"temp"]
  z <- timeTemp[which(timeTemp$Strain == alga),"FAME"]

  s3d <- scatterplot3d(x, y, z, highlight.3d=TRUE,col.axis="black",
    col.grid="lightblue", main= alga, pch=8, xlab = "Time (min)", ylab = "Temp (°C)",
zlab = "FAME (%DW)")
  my.lm <- lm(timeTemp[which(timeTemp$Strain == alga),"FAME"] ~
timeTemp[which(timeTemp$Strain == alga),"time"] + timeTemp[which(timeTemp$Strain ==
alga),"temp"])
print( summary(my.lm))
s3d$plane3d(my.lm, lty = "dotted", col = "black")
  my.lm <- lm(timeTemp[which(timeTemp$Strain == alga & timeTemp$time > 30 &
timeTemp$temp > 75),"FAME"] ~ timeTemp[which(timeTemp$Strain == alga &
timeTemp$time > 30 & timeTemp$temp > 75),"time"] + timeTemp[which(timeTemp$Strain
== alga & timeTemp$time > 30 & timeTemp$temp > 75),"temp"])
  print( summary(my.lm))
  s3d$plane3d(my.lm, lty = "solid")

}

```

```

quartz(height = 12, width = 12)
par(mfrow = c(2,2))

```

```

alga <- "Cv.Replete"
plotExpDesign(alga=alga)
alga <- "Cv.Deplete"
plotExpDesign(alga = alga)
alga <- "Nanno"
plotExpDesign(alga = alga)
alga <- "Phaeo"
plotExpDesign(alga = alga)

```

```

#statistics

```

```

# analysis of variance of the FAME content with varying time and temperature
j <- aov(FAME ~ time+temp, data= timeTemp[which(timeTemp$Strain == "Cv.Replete"),]);
summary(j)
j <- aov(FAME ~ time+temp, data= timeTemp[which(timeTemp$Strain == "Cv.Deplete"),]);
summary(j)
j <- aov(FAME ~ time+temp, data= timeTemp[which(timeTemp$Strain == "Nanno"),]);
summary(j)
j <- aov(FAME ~ time+temp, data= timeTemp[which(timeTemp$Strain == "Phaeo"),]);
summary(j)

```

```

# show that above a certain temperature the differences become insignificant above 75C

```

```
j <- aov(FAME ~ time+temp, data= timeTemp[which(timeTemp$Strain == "Cv.Replete" &
timeTemp$temp > 75),]); summary(j)
j <- aov(FAME ~ time+temp, data= timeTemp[which(timeTemp$Strain == "Cv.Deplete" &
timeTemp$temp > 75),]); summary(j)
j <- aov(FAME ~ time+temp, data= timeTemp[which(timeTemp$Strain == "Nanno" &
timeTemp$temp > 75),]); summary(j)
j <- aov(FAME ~ time+temp, data= timeTemp[which(timeTemp$Strain == "Phaeo" &
timeTemp$temp > 75),]); summary(j)
```

```
# show that above a certain time the differences become insignificant at times longer than 30
min
```

```
j <- aov(FAME ~ time+temp, data= timeTemp[which(timeTemp$Strain == "Cv.Replete" &
timeTemp$time > 30),]); summary(j)
j <- aov(FAME ~ time+temp, data= timeTemp[which(timeTemp$Strain == "Cv.Deplete" &
timeTemp$time > 30),]); summary(j)
j <- aov(FAME ~ time+temp, data= timeTemp[which(timeTemp$Strain == "Nanno" &
timeTemp$time > 30),]); summary(j)
j <- aov(FAME ~ time+temp, data= timeTemp[which(timeTemp$Strain == "Phaeo" &
timeTemp$time > 30),]); summary(j)
```

```
# show that above a certain time/temp the differences become insignificant >75C and > 30
min
```

```
j <- aov(FAME ~ time+temp, data= timeTemp[which(timeTemp$Strain == "Cv.Replete" &
timeTemp$time > 30 & timeTemp$temp > 75),]); summary(j)
j <- aov(FAME ~ time+temp, data= timeTemp[which(timeTemp$Strain == "Cv.Deplete" &
timeTemp$time > 30 & timeTemp$temp > 75),]); summary(j)
j <- aov(FAME ~ time+temp, data= timeTemp[which(timeTemp$Strain == "Nanno" &
timeTemp$time > 30 & timeTemp$temp > 75),]); summary(j)
j <- aov(FAME ~ time+temp, data= timeTemp[which(timeTemp$Strain == "Phaeo" &
timeTemp$time > 30 & timeTemp$temp > 75),]); summary(j)
```

```
#####
### END OF FILE ### END OF FILE ### END OF FILE ###
```

---

---

**Table S1:** Raw data for extraction variability presented in Figure 1

| methods   | method.2         | extract |
|-----------|------------------|---------|
| soxhlet.1 | soxhlet.16h      | 31,04   |
| soxhlet.1 | soxhlet.16h      | 30,71   |
| soxhlet.1 | soxhlet.16h      | 30,34   |
| soxhlet.1 | soxhlet.16h      | 32,15   |
| soxhlet.2 | soxhlet.3h.w     | 33.283  |
| soxhlet.2 | soxhlet.3h.w     | 33.046  |
| soxhlet.2 | soxhlet.3h.w     | 31.551  |
| ASE.1     | ASE.40C.500p     | 33.601  |
| ASE.1     | ASE.40C.500p     | 33.939  |
| ASE.1     | ASE.40C.500p     | 33.980  |
| ASE.2     | ASE.100C.2000p   | 39,08   |
| ASE.2     | ASE.100C.2000p   | 39,07   |
| ASE.2     | ASE.100C.2000p   | 38,68   |
| ASE.3     | ASE.40C.500p.H   | 7,07    |
| ASE.3     | ASE.40C.500p.H   | 7,44    |
| ASE.3     | ASE.40C.500p.H   | 7,12    |
| ASE.4     | ASE.100C.2000p.H | 17,79   |
| ASE.4     | ASE.100C.2000p.H | 18,13   |
| ASE.4     | ASE.100C.2000p.H | 17,74   |

**Table S2:** Raw data for catalyst study reported in Figure 2

|             | Catalyst    | strain          | type      | time | FAME       |
|-------------|-------------|-----------------|-----------|------|------------|
| NaOMe.BF3.1 | AOAC.991.39 | Nannochloropsis | acid.base | 35   | 10,3661698 |
| NaOMe.BF3.1 | AOAC.991.39 | Nannochloropsis | acid.base | 35   | 10,6448669 |
| NaOMe.BF3.1 | AOAC.991.39 | Nannochloropsis | acid.base | 35   | 10,5304166 |
| NaOMe.BF3.1 | AOAC.991.39 | Nannochloropsis | acid.base | 35   | 10,89      |
| NaOMe.BF3.1 | AOAC.991.39 | Nannochloropsis | acid.base | 35   | 10,73      |
| NaOMe.BF3.1 | AOAC.991.39 | Nannochloropsis | acid.base | 35   | 10,84      |
| NaOMe.BF3.1 | AOAC.991.39 | Nannochloropsis | acid.base | 35   | 10,6150179 |
| NaOMe.BF3.1 | AOAC.991.39 | Nannochloropsis | acid.base | 35   | 10,2841782 |
| NaOMe.BF3.1 | AOAC.991.39 | Nannochloropsis | acid.base | 35   | 10,5312541 |
| NaOMe.BF3.1 | AOAC.991.39 | Nannochloropsis | acid.base | 35   | 10,1391647 |
| NaOMe.BF3.1 | AOAC.991.39 | Nannochloropsis | acid.base | 35   | 10,2341877 |
| NaOMe.BF3.1 | AOAC.991.39 | Nannochloropsis | acid.base | 35   | 10,5674038 |
| HCl.MeOH.1  | NREL.HCl    | Nannochloropsis | acid      | 60   | 10,3400016 |
| HCl.MeOH.1  | NREL.HCl    | Nannochloropsis | acid      | 60   | 10,6096221 |
| HCl.MeOH.1  | NREL.HCl    | Nannochloropsis | acid      | 60   | 10,3279988 |
| HCl.MeOH.1  | NREL.HCl    | Nannochloropsis | acid      | 60   | 10,4632    |
| HCl.MeOH.1  | NREL.HCl    | Nannochloropsis | acid      | 60   | 10,4992156 |
| TMG         | TMG         | Nannochloropsis | base      | 5    | 6,96       |
| TMG         | TMG         | Nannochloropsis | base      | 5    | 7,64       |
| TMG         | TMG         | Nannochloropsis | base      | 5    | 8,34       |
| TMG         | TMG         | Nannochloropsis | base      | 5    | 7,17       |
| TMG         | TMG         | Nannochloropsis | base      | 5    | 7,08       |
| TMG         | TMG         | Nannochloropsis | base      | 5    | 7,17       |
| TMG         | TMG         | Nannochloropsis | base      | 5    | 8,81       |
| TMG         | TMG         | Nannochloropsis | base      | 5    | 8,26       |
| TMG         | TMG         | Nannochloropsis | base      | 5    | 8,2        |

|             |               |                 |           |    |            |
|-------------|---------------|-----------------|-----------|----|------------|
| NaOMe       | NaOMe         | Nannochloropsis | base      | 5  | 0          |
| NaOMe       | NaOMe         | Nannochloropsis | base      | 5  | 0          |
| NaOMe       | NaOMe         | Nannochloropsis | base      | 5  | 0          |
| HCl.MeOH.1  | NREL.HCl      | Nannochloropsis | acid      | 60 | 10,79      |
| HCl.MeOH.1  | NREL.HCl      | Nannochloropsis | acid      | 60 | 10,53      |
| HCl.MeOH.1  | NREL.HCl      | Nannochloropsis | acid      | 60 | 10,6351361 |
| HCl.MeOH.1  | NREL.HCl      | Nannochloropsis | acid      | 60 | 10,4195698 |
| HCl.MeOH.1  | NREL.HCl      | Nannochloropsis | acid      | 60 | 10,5792685 |
| HCl.MeOH.1  | NREL.HCl      | Nannochloropsis | acid      | 60 | 10,5097181 |
| HCl.MeOH.1  | NREL.HCl      | Nannochloropsis | acid      | 60 | 10,381     |
| HCl.MeOH.1  | NREL.HCl      | Nannochloropsis | acid      | 60 | 10,617     |
| HCl.MeOH.1  | NREL.HCl      | Nannochloropsis | acid      | 60 | 10,49      |
| HCl.MeOH.1  | NREL.HCl      | Nannochloropsis | acid      | 60 | 12,722     |
| HCl.MeOH.1  | NREL.HCl      | Nannochloropsis | acid      | 60 | 10,744     |
| HCl.MeOH.1  | NREL.HCl      | Nannochloropsis | acid      | 60 | 10,428     |
| HCl.MeOH.1  | NREL.HCl      | Nannochloropsis | acid      | 60 | 10,409     |
| HCl.MeOH.1  | NREL.HCl      | Nannochloropsis | acid      | 60 | 10,374     |
| HCl.MeOH.1  | NREL.HCl      | Nannochloropsis | acid      | 60 | 10,922     |
| HCl.MeOH.1  | NREL.HCl      | Nannochloropsis | acid      | 60 | 10,73      |
| HCl.MeOH.1  | NREL.HCl      | Nannochloropsis | acid      | 60 | 10,788     |
| HCl.MeOH.2  | NREL.HCl.noCM | Nannochloropsis | acid      | 60 | 10,3573287 |
| HCl.MeOH.2  | NREL.HCl.noCM | Nannochloropsis | acid      | 60 | 10,4514842 |
| HCl.MeOH.2  | NREL.HCl.noCM | Nannochloropsis | acid      | 60 | 10,6543872 |
| NaOMe.BF3.2 | micro.991.39  | Nannochloropsis | acid.base | 35 | 10,6017737 |
| NaOMe.BF3.2 | micro.991.39  | Nannochloropsis | acid.base | 35 | 10,6354279 |
| NaOMe.BF3.2 | micro.991.39  | Nannochloropsis | acid.base | 35 | 10,7642059 |
| NaOMe.BF3.2 | micro.991.39  | Nannochloropsis | acid.base | 35 | 10,23      |
| NaOMe.BF3.2 | micro.991.39  | Nannochloropsis | acid.base | 35 | 10,57      |
| NaOMe.BF3.2 | micro.991.39  | Nannochloropsis | acid.base | 35 | 10,14      |

|           |          |                 |           |    |            |
|-----------|----------|-----------------|-----------|----|------------|
| BF3       | BF3      | Nannochloropsis | acid      | 35 | 9,74927967 |
| BF3       | BF3      | Nannochloropsis | acid      | 35 | 9,97254402 |
| BF3       | BF3      | Nannochloropsis | acid      | 35 | 9,81523606 |
| mAOAC.922 | AOAC.922 | Nannochloropsis | base.acid |    | 6,64       |
| mAOAC.922 | AOAC.922 | Nannochloropsis | base.acid |    | 6,31       |
| mAOAC.922 | AOAC.922 | Nannochloropsis | base.acid |    | 7,46       |
| mAOAC.989 | AOAC.989 | Nannochloropsis | acid      |    | 3,78       |
| mAOAC.989 | AOAC.989 | Nannochloropsis | acid      |    | 3,5        |
| mAOAC.989 | AOAC.989 | Nannochloropsis | acid      |    | 3,08       |

**Table S3:** Raw data for time and temperature interactions on total FAME response (based on experimental design)

| Strain     | time | temp  | FAME       |
|------------|------|-------|------------|
| Cv.Deplete | 39,5 | 71    | 9,35138347 |
| Cv.Deplete | 39,5 | 71    | 9,22642521 |
| Cv.Deplete | 25   | 75    | 8,69333715 |
| Cv.Deplete | 25   | 75    | 8,79711429 |
| Cv.Deplete | 54   | 75    | 9,83840289 |
| Cv.Deplete | 54   | 75    | 9,39530271 |
| Cv.Deplete | 19   | 85    | 9,26264538 |
| Cv.Deplete | 19   | 85    | 9,24135346 |
| Cv.Deplete | 60   | 85    | 9,72127272 |
| Cv.Deplete | 60   | 85    | 9,58250441 |
| Cv.Deplete | 39,5 | 85    | 9,70326219 |
| Cv.Deplete | 39,5 | 85    | 9,40540267 |
| Cv.Deplete | 39,5 | 85    | 9,59706773 |
| Cv.Deplete | 39,5 | 85    | 9,57450699 |
| Cv.Deplete | 39,5 | 85    | 9,50177447 |
| Cv.Deplete | 25   | 95    | 10,0692024 |
| Cv.Deplete | 25   | 95    | 10,005994  |
| Cv.Deplete | 54   | 95    | 9,47911475 |
| Cv.Deplete | 54   | 95    | 9,51889956 |
| Cv.Deplete | 39,5 | 99,14 | 9,59235971 |
| Cv.Deplete | 39,5 | 99,14 | 9,67888257 |
| Cv.Replete | 39,5 | 71    | 44,1499047 |
| Cv.Replete | 39,5 | 71    | 41,7176853 |
| Cv.Replete | 25   | 75    | 38,5464441 |
| Cv.Replete | 25   | 75    | 43,3060809 |
| Cv.Replete | 54   | 75    | 54,4678852 |

|            |      |       |            |
|------------|------|-------|------------|
| Cv.Replete | 54   | 75    | 51,9676452 |
| Cv.Replete | 19   | 85    | 48,3895128 |
| Cv.Replete | 19   | 85    | 49,7678182 |
| Cv.Replete | 60   | 85    | 60,697067  |
| Cv.Replete | 60   | 85    | 59,6912157 |
| Cv.Replete | 39,5 | 85    | 59,3374208 |
| Cv.Replete | 39,5 | 85    | 57,8574368 |
| Cv.Replete | 39,5 | 85    | 57,6898667 |
| Cv.Replete | 39,5 | 85    | 59,0413861 |
| Cv.Replete | 39,5 | 85    | 59,1132766 |
| Cv.Replete | 25   | 95    | 61,8371763 |
| Cv.Replete | 25   | 95    | 63,5469955 |
| Cv.Replete | 54   | 95    | 60,7659138 |
| Cv.Replete | 54   | 95    | 62,9681751 |
| Cv.Replete | 39,5 | 99,14 | 60,3632555 |
| Cv.Replete | 39,5 | 99,14 | 60,006168  |
| Nanno      | 39,5 | 71    | 10,7451868 |
| Nanno      | 39,5 | 71    | 10,6392304 |
| Nanno      | 25   | 75    | 10,1560581 |
| Nanno      | 25   | 75    | 10,619519  |
| Nanno      | 54   | 75    | 10,5270283 |
| Nanno      | 54   | 75    | 10,541288  |
| Nanno      | 19   | 85    | 10,5321546 |
| Nanno      | 19   | 85    | 10,4098023 |
| Nanno      | 60   | 85    | 11,0137448 |
| Nanno      | 60   | 85    | 11,123797  |
| Nanno      | 39,5 | 85    | 10,8349856 |
| Nanno      | 39,5 | 85    | 10,8744358 |
| Nanno      | 39,5 | 85    | 11,189628  |

|       |      |       |            |
|-------|------|-------|------------|
| Nanno | 39,5 | 85    | 11,009422  |
| Nanno | 25   | 95    | 10,6890734 |
| Nanno | 25   | 95    | 10,5048117 |
| Nanno | 54   | 95    | 10,9444261 |
| Nanno | 54   | 95    | 10,8446819 |
| Nanno | 39,5 | 99,14 | 10,8694398 |
| Nanno | 39,5 | 99,14 | 10,8807655 |
| Phaeo | 39,5 | 71    | 7,32013324 |
| Phaeo | 39,5 | 71    | 6,86990175 |
| Phaeo | 25   | 75    | 7,34887284 |
| Phaeo | 25   | 75    | 7,19967903 |
| Phaeo | 54   | 75    | 7,8022632  |
| Phaeo | 54   | 75    | 7,02306652 |
| Phaeo | 19   | 85    | 7,87946668 |
| Phaeo | 19   | 85    | 7,81281528 |
| Phaeo | 60   | 85    | 7,79226307 |
| Phaeo | 60   | 85    | 7,72755843 |
| Phaeo | 39,5 | 85    | 7,91216034 |
| Phaeo | 39,5 | 85    | 7,92111971 |
| Phaeo | 39,5 | 85    | 8,01755129 |
| Phaeo | 39,5 | 85    | 8,08951455 |
| Phaeo | 39,5 | 85    | 8,36488877 |
| Phaeo | 25   | 95    | 7,9455125  |
| Phaeo | 25   | 95    | 7,64875514 |
| Phaeo | 54   | 95    | 8,34505977 |
| Phaeo | 54   | 95    | 7,80337307 |
| Phaeo | 39,5 | 99,14 | 8,13147606 |
| Phaeo | 39,5 | 99,14 | 7,68850135 |

**Table S4:** Analysis of variance table (partial sum of squares - Type III) for Response Surface Reduced Quadratic Model

| Source      | <b>Nannochloropsis</b> |    |             |         |                  | <b>Phaeodactylum</b> |    |             |         |                  |
|-------------|------------------------|----|-------------|---------|------------------|----------------------|----|-------------|---------|------------------|
|             | Sum of Squares         | df | Mean Square | F Value | p-value Prob > F | Sum of Squares       | df | Mean Square | F Value | p-value Prob > F |
| Model       | 0,85                   | 4  | 0,21        | 7,57    | 0.0015           | 2,22                 | 4  | 0,56        | 9,57    | 0.0004           |
| A-Time      | 0,42                   | 1  | 0,42        | 14,78   | 0.0016           | 0,02                 | 1  | 0,02        | 0,37    | 0.5510           |
| B-Temp      | 0,17                   | 1  | 0,17        | 6,10    | 0.0260           | 1,37                 | 1  | 1,37        | 23,52   | 0.0002           |
| A^2         | 0,20                   | 1  | 0,20        | 7,02    | 0.0182           | 0,18                 | 1  | 0,18        | 3,11    | 0.0968           |
| B^2         | 0,18                   | 1  | 0,18        | 6,38    | 0.0233           | 0,82                 | 1  | 0,82        | 14,20   | 0.0017           |
| Residual    | 0,42                   | 15 | 0,03        |         |                  | 0,93                 | 16 | 0,06        |         |                  |
| Lack of Fit | 0,20                   | 4  | 0,05        | 2,39    | 0.1140           | 0,08                 | 4  | 0,02        | 0,29    | 0.8766           |
| Pure Error  | 0,23                   | 11 | 0,02        |         |                  | 0,85                 | 12 | 0,07        |         |                  |
| Cor Total   | 1,27                   | 19 |             |         |                  | 3,15                 | 20 |             |         |                  |

  

| Source      | <b>replete C. vulgaris</b> |    |             |         |                  | <b>deplete C. vulgaris</b> |    |             |         |                  |
|-------------|----------------------------|----|-------------|---------|------------------|----------------------------|----|-------------|---------|------------------|
|             | Sum of Squares             | df | Mean Square | F Value | p-value Prob > F | Sum of Squares             | df | Mean Square | F Value | p-value Prob > F |
| Model       | 1,89                       | 3  | 0,63        | 31,46   | < 0.0001         | 1021,87                    | 3  | 340,62      | 37,95   | < 0.0001         |
| A-Time      | 0,20                       | 1  | 0,20        | 10,08   | 0.0055           | 184,77                     | 1  | 184,77      | 20,59   | 0.0003           |
| B-Temp      | 0,69                       | 1  | 0,69        | 34,62   | < 0.0001         | 751,08                     | 1  | 751,08      | 83,68   | < 0.0001         |
| AB          | 0,99                       | 1  | 0,99        | 49,68   | < 0.0001         | 86,02                      | 1  | 86,02       | 9,58    | 0.0066           |
| Residual    | 0,34                       | 17 | 0,02        |         |                  | 152,58                     | 17 | 8,98        |         |                  |
| Lack of Fit | 0,16                       | 5  | 0,03        | 2,21    | 0.1207           | 127,38                     | 5  | 25,48       | 12,13   | 0.0002           |
| Pure Error  | 0,18                       | 12 | 0,01        |         |                  | 25,20                      | 12 | 2,10        |         |                  |
| Cor Total   | 2,23                       | 20 |             |         |                  | 1174,45                    | 20 |             |         |                  |
